# Supplementary material for: The Antioxidant, Anti-Diabetic, and Anti-Adipogenesis Potential and Probiotic Properties of Lactic Acid Bacteria Isolated from Human and Fermented Foods
Source: MDPI journal article supplement (doi:10.3390/fermentation7030123), 2021-07-21
Supplement: s1 [file s1]

## SUPPORTING INFORMATION

**Table S1.** Inhibitory effects of lipid accumulation in 3T3-L1 adipocytes cells of lactic acid bacteria (n = 3).

| Samples      |         | Identification                       | Lipid Accumulation (%) | NCBI Accession No. |
|--------------|---------|--------------------------------------|------------------------|--------------------|
| Resources    | Strains |                                      |                        |                    |
| Control      |         | -                                    | 39.4 ± 1.5             | -                  |
| MDI          |         | -                                    | 100.0 ± 9.6            | -                  |
| Breast milk  | MG4503  | <i>Lactobacillus gasseri</i>         | 95 ± 2.8               | MN368048           |
|              | MG4505  | <i>Lacticaseibacillus rhamnosus</i>  | 48.4 ± 5.5             | MN368049           |
|              | MG4506  | <i>Lactobacillus gasseri</i>         | 101.7 ± 4.2            | MN368050           |
|              | MG4507  | <i>Lactobacillus gasseri</i>         | 97.4 ± 3.5             | MN368051           |
|              | MG4508  | <i>Lactobacillus gasseri</i>         | 94.5 ± 3.0             | MN368052           |
|              | MG4512  | <i>Lactobacillus gasseri</i>         | 101.0 ± 1.5            | MN832997           |
|              | MG4522  | <i>Lactobacillus gasseri</i>         | 90.7 ± 0.3             | MN833005           |
|              | MG4523  | <i>Lactobacillus gasseri</i>         | 117.8 ± 7.9            | MN833006           |
| Infant feces | MG4500  | <i>Limosilactobacillus fermentum</i> | 75.7 ± 4.1             | MN368200           |
|              | MG4501  | <i>Lacticaseibacillus rhamnosus</i>  | 54.8 ± 5.9             | MN368046           |
|              | MG4502  | <i>Lacticaseibacillus rhamnosus</i>  | 41.0 ± 3.1             | MN368047           |
|              | MG4510  | <i>Limosilactobacillus fermentum</i> | 64.4 ± 9.0             | MN368053           |
|              | MG4511  | <i>Lacticaseibacillus rhamnosus</i>  | 53.0 ± 6.1             | MN368054           |
|              | MG4513  | <i>Lactobacillus gasseri</i>         | 107.4 ± 4.1            | MN832998           |
|              | MG4514  | <i>Lactobacillus gasseri</i>         | 112.6 ± 1.2            | MN832999           |
|              | MG4515  | <i>Lactobacillus gasseri</i>         | 119.4 ± 4.8            | MN833000           |
|              | MG4519  | <i>Lactiplantibacillus plantarum</i> | 70.6 ± 6.9             | MN833002           |
|              | MG4520  | <i>Lactobacillus gasseri</i>         | 98.3 ± 2.1             | MN833003           |
|              | MG4521  | <i>Lactobacillus gasseri</i>         | 109.9 ± 7.9            | MN833004           |
|              | MG4524  | <i>Lactobacillus gasseri</i>         | 57.4 ± 4.7             | MN938126           |
|              | MG4525  | <i>Ligilactobacillus salivarius</i>  | 121.5 ± 2.5            | MN938127           |
|              | MG4526  | <i>Ligilactobacillus salivarius</i>  | 73.1 ± 7.1             | MN938128           |
|              | MG4527  | <i>Ligilactobacillus salivarius</i>  | 98.8 ± 8.5             | MN938129           |
|              | MG4529  | <i>Limosilactobacillus fermentum</i> | 67.9 ± 4.4             | MN938130           |
|              | MG4530  | <i>Limosilactobacillus fermentum</i> | 65.8 ± 0.8             | MN938131           |
|              | MG4531  | <i>Limosilactobacillus fermentum</i> | 111.1 ± 12.8           | MN938132           |
|              | MG4532  | <i>Limosilactobacillus fermentum</i> | 94.0 ± 5.6             | MN938133           |
|              | MG4533  | <i>Limosilactobacillus fermentum</i> | 78.0 ± 2.5             | MN938134           |
|              | MG4534  | <i>Limosilactobacillus fermentum</i> | 73.9 ± 7.1             | MN368554           |
|              | MG4535  | <i>Limosilactobacillus fermentum</i> | 74.8 ± 0.4             | MN368555           |
|              | MG4536  | <i>Limosilactobacillus fermentum</i> | 75.6 ± 0.1             | MN368556           |
|              | MG4538  | <i>Limosilactobacillus fermentum</i> | 76.1 ± 1.2             | MN368558           |
|              | MG4546  | <i>Pediococcus acidilactici</i>      | 69.1 ± 4.6             | MN368260           |
|              | MG4548  | <i>Pediococcus acidilactici</i>      | 62.8 ± 3.4             | MN368262           |
|              | MG4549  | <i>Weissella cibaria</i>             | 80.1 ± 18.1            | MN368263           |
|              | MG4553  | <i>Lactiplantibacillus plantarum</i> | 49.0 ± 3.2             | MN368266           |
|              | MG4573  | <i>Lactobacillus acidophilus</i>     | 127.3 ± 5.1            | MT225572           |
|              | MG4575  | <i>Lactobacillus gasseri</i>         | 72.0 ± 3.3             | MT225592           |
|              | MG4577  | <i>Lacticaseibacillus paracasei</i>  | 119.5 ± 8.1            | MN833017           |
|              | MG4583  | <i>Lactobacillus gasseri</i>         | 67.5 ± 5.2             | MN833022           |
|              | MG4586  | <i>Lactiplantibacillus plantarum</i> | 67.1 ± 14.1            | MN833024           |

|                   |        |                                                         |              |          |
|-------------------|--------|---------------------------------------------------------|--------------|----------|
|                   | MG4589 | <i>Bifidobacterium animalis</i><br>subsp. <i>lactis</i> | 74.0 ± 1.4   | MT225594 |
|                   | MG5149 | <i>Limosilactobacillus reuteri</i>                      | 47.4 ± 3.7   | MN339979 |
| Fermented<br>milk | MG5131 | <i>Lacticaseibacillus paracasei</i>                     | 66.2 ± 1.8   | MN368274 |
|                   | MG5135 | <i>Lacticaseibacillus paracasei</i>                     | 74.2 ± 1.1   | MN339971 |
|                   | MG5143 | <i>Lactiplantibacillus plantarum</i>                    | 71.0 ± 2.3   | MN368576 |
|                   | MG5146 | <i>Lacticaseibacillus paracasei</i>                     | 77.0 ± 1.3   | MN368275 |
|                   | MG5148 | <i>Lacticaseibacillus paracasei</i>                     | 79.3 ± 2.4   | MN339978 |
|                   | MG5124 | <i>Lactococcus lactis</i>                               | 84.9 ± 1.1   | MN368057 |
|                   | MG5126 | <i>Lactococcus lactis</i>                               | 82.6 ± 6.6   | MN368059 |
|                   | MG5127 | <i>Lactococcus lactis</i>                               | 93.6 ± 6.6   | MN368060 |
|                   | MG5128 | <i>Lactococcus lactis</i>                               | 71.1 ± 7.0   | MN368061 |
|                   | MG5129 | <i>Lactococcus lactis</i>                               | 77.4 ± 0.2   | MN368062 |
|                   | MG5139 | <i>Streptococcus thermophilus</i>                       | 70.8 ± 0.0   | MN339975 |
|                   | MG5141 | <i>Lactiplantibacillus plantarum</i>                    | 68.6 ± 2.5   | MN368574 |
|                   | MG5150 | <i>Streptococcus thermophilus</i>                       | 103.2 ± 2.5  | MN435572 |
|                   | MG5152 | <i>Streptococcus thermophilus</i>                       | 56.9 ± 3.9   | MN435574 |
|                   | MG5154 | <i>Limosilactobacillus fermentum</i>                    | 75.9 ± 16.9  | MN435575 |
|                   | MG5155 | <i>Lactiplantibacillus plantarum</i>                    | 76.2 ± 11.9  | MN435576 |
|                   | MG5158 | <i>Limosilactobacillus fermentum</i>                    | 84.7 ± 4.7   | MN435578 |
|                   | MG5159 | <i>Limosilactobacillus fermentum</i>                    | 68.9 ± 13.1  | MN435579 |
|                   | MG5160 | <i>Limosilactobacillus fermentum</i>                    | 63.5 ± 2.2   | MN435580 |
|                   | MG5161 | <i>Lactobacillus helveticus</i>                         | 88.7 ± 2.9   | MN435581 |
|                   | MG5162 | <i>Lactobacillus helveticus</i>                         | 88.6 ± 2.2   | MN368268 |
|                   | MG5163 | <i>Lacticaseibacillus paracasei</i>                     | 159 ± 16.5   | MN368269 |
|                   | MG5171 | <i>Lacticaseibacillus paracasei</i>                     | 80.8 ± 6.4   | MN368571 |
|                   | MG5178 | <i>Lacticaseibacillus paracasei</i>                     | 83.9 ± 7.6   | MN368273 |
|                   | MG5185 | <i>Lactiplantibacillus plantarum</i>                    | 103.3 ± 18.4 | MN368276 |
|                   | MG5187 | <i>Lactiplantibacillus plantarum</i>                    | 68.5 ± 0.0   | MN368582 |
|                   | MG5188 | <i>Lactiplantibacillus plantarum</i>                    | 79.3 ± 1.8   | MN749942 |
|                   | MG5189 | <i>Lacticaseibacillus paracasei</i>                     | 75.9 ± 8.7   | MN749943 |
|                   | MG5200 | <i>Lacticaseibacillus rhamnosus</i>                     | 97.0 ± 0.9   | MN368277 |
|                   | MG5203 | <i>Lactiplantibacillus plantarum</i>                    | 44.8 ± 2.5   | MN720602 |
|                   | MG5227 | <i>Weissella cibaria</i>                                | 89.1 ± 0.6   | MN368418 |
|                   | MG5230 | <i>Lactobacillus delbrueckii</i>                        | 94.7 ± 2.0   | MN368421 |
|                   | MG5231 | <i>Lactobacillus acidophilus</i>                        | 59.0 ± 4.0   | MN368422 |
|                   | MG5260 | <i>Lactiplantibacillus plantarum</i>                    | 69.6 ± 3.9   | MN749953 |
|                   | MG5274 | <i>Lacticaseibacillus zeae</i>                          | 75.4 ± 3.6   | MN759453 |
|                   | MG5275 | <i>Lacticaseibacillus casei</i>                         | 68.8 ± 11.6  | MN759454 |
|                   | MG5276 | <i>Lactiplantibacillus plantarum</i>                    | 74.8 ± 9.0   | MN759455 |
|                   | MG5277 | <i>Pediococcus acidilactici</i>                         | 68.5 ± 4.0   | MN759456 |
|                   | MG5278 | <i>Lactococcus lactis</i>                               | 110.1 ± 8.6  | MN759457 |
| Fruit             | MG5310 | <i>Lacticaseibacillus paracasei</i>                     | 59.0 ± 1.2   | MN720512 |
|                   | MG5259 | <i>Lactobacillus delbrueckii</i>                        | 113.0 ± 20.6 | MN749952 |
| Kimchi            | MG5219 | <i>Lacticaseibacillus paracasei</i>                     | 80.1 ± 2.3   | MN368207 |
|                   | MG5220 | <i>Lactobacillus helveticus</i>                         | 101.6 ± 8.4  | MN368208 |
|                   | MG5221 | <i>Leuconostoc mesenteroides</i>                        | 99.7 ± 1.1   | MN368209 |
|                   | MG5223 | <i>Weissella cibaria</i>                                | 93.1 ± 13.4  | MN368414 |
|                   | MG5229 | <i>Lactobacillus acidophilus</i>                        | 66.7 ± 3.1   | MN368420 |
|                   | MG5234 | <i>Weissella cibaria</i>                                | 89.8 ± 5.1   | MN720515 |

|         |        |                                      |              |          |
|---------|--------|--------------------------------------|--------------|----------|
|         | MG5239 | <i>Lactiplantibacillus plantarum</i> | 72.8 ± 7.8   | MN720520 |
|         | MG5243 | <i>Lactiplantibacillus plantarum</i> | 128.2 ± 38.7 | MN720523 |
|         | MG5245 | <i>Lactocaseibacillus paracasei</i>  | 67.4 ± 4.4   | MN368278 |
|         | MG5246 | <i>Lactilactobacillus curvatus</i>   | 83.1 ± 4.5   | MN368279 |
|         | MG5270 | <i>Lactiplantibacillus plantarum</i> | 94.4 ± 7.4   | MN759449 |
|         | MG5279 | <i>Lactilactobacillus curvatus</i>   | 93.6 ± 6.9   | MN759458 |
|         | MG5285 | <i>Weissella cibaria</i>             | 53.4 ± 3.3   | MN368068 |
|         | MG5355 | <i>Lactiplantibacillus plantarum</i> | 62.9 ± 11.4  | MT225596 |
| Seafood | MG5316 | <i>Pediococcus pentosaceus</i>       | 59.4 ± 2.0   | MN704679 |
|         | MG5324 | <i>Lactiplantibacillus plantarum</i> | 138.5 ± 8.5  | MN704687 |
